# Supplementary material for: Reduction in N-Acetylglucosaminyltransferase-I Activity Decreases Survivability and Delays Development of Zebrafish
Source: MDPI journal article supplement (doi:10.3390/cimb45110575), 2023-11-15
Supplement: s1 [file s1]

**Table S1.** Zebrafish primers used for real time PCR.

| Gene           | Forward               | Reverse               |
|----------------|-----------------------|-----------------------|
| Mgat1a         | GGTTGTTGTTGTGGAGGACGA | TTGTCATTCCAGGCAGACACG |
| Mgat1b         | ACAAGATCGCCAGGCACTAC  | ACAGCGCACGGAAATACTCA  |
| $\beta$ -actin | AGTTGTCTAACAGGGGAGAGC | TTGTGAGGAGGGCAAAGTGG  |
| elfa           | CTTCTCAGGCTGACTGTGC   | CCGCTAGCATTACCCTCC    |

**Table S2.** Relative abundancies of each of the N-glycans from the Wt AB strain using ESI-MS.

| Observed m/z<br>(Na <sup>+</sup> ) | Composition                                                                                                                 | Relative % |
|------------------------------------|-----------------------------------------------------------------------------------------------------------------------------|------------|
| 1579.7849                          | (Hex) <sub>2</sub> + (Man) <sub>3</sub> (GlcNAc) <sub>2</sub>                                                               | 14.4       |
| 1783.8851                          | (Hex) <sub>3</sub> + (Man) <sub>3</sub> (GlcNAc) <sub>2</sub>                                                               | 5.4        |
| 1987.9858                          | (Hex) <sub>4</sub> + (Man) <sub>3</sub> (GlcNAc) <sub>2</sub>                                                               | 3.5        |
| 2040.0272                          | (Hex) <sub>1</sub> (HexNAc) <sub>2</sub> (Fuc) <sub>1</sub> + (Man) <sub>3</sub> (GlcNAc) <sub>2</sub>                      | 1.7        |
| 2070.0395                          | (Hex) <sub>2</sub> (HexNAc) <sub>2</sub> + (Man) <sub>3</sub> (GlcNAc) <sub>2</sub>                                         | 1.3        |
| 2081.0537                          | (HexNAc) <sub>3</sub> (Fuc) <sub>1</sub> + (Man) <sub>3</sub> (GlcNAc) <sub>2</sub>                                         | 8.9        |
| 2173.0784                          | (Hex) <sub>2</sub> (HexNAc) <sub>1</sub> (Fuc) <sub>2</sub> + (Man) <sub>3</sub> (GlcNAc) <sub>2</sub>                      | 0.0        |
| 2186.0854                          | (Hex) <sub>2</sub> (HexNAc) <sub>1</sub> (NeuAc) <sub>1</sub> + (Man) <sub>3</sub> (GlcNAc) <sub>2</sub>                    | 0.6        |
| 2192.0854                          | (Hex) <sub>5</sub> + (Man) <sub>3</sub> (GlcNAc) <sub>2</sub>                                                               | 3.4        |
| 2244.1277                          | (Hex) <sub>2</sub> (HexNAc) <sub>2</sub> (Fuc) <sub>1</sub> + (Man) <sub>3</sub> (GlcNAc) <sub>2</sub>                      | 3.8        |
| 2285.1539                          | (Hex) <sub>1</sub> (HexNAc) <sub>3</sub> (Fuc) <sub>1</sub> + (Man) <sub>3</sub> (GlcNAc) <sub>2</sub>                      | 1.1        |
| 2360.1746                          | (Hex) <sub>2</sub> (HexNAc) <sub>1</sub> (Fuc) <sub>1</sub> (NeuAc) <sub>1</sub> + (Man) <sub>3</sub> (GlcNAc) <sub>2</sub> | 1.9        |
| 2390.1850                          | (Hex) <sub>3</sub> (HexNAc) <sub>1</sub> (NeuAc) <sub>1</sub> + (Man) <sub>3</sub> (GlcNAc) <sub>2</sub>                    | 2.8        |
| 2396.1844                          | (Hex) <sub>6</sub> + (Man) <sub>3</sub> (GlcNAc) <sub>2</sub>                                                               | 5.1        |
| 2418.2135                          | (Hex) <sub>2</sub> (HexNAc) <sub>2</sub> (Fuc) <sub>2</sub> + (Man) <sub>3</sub> (GlcNAc) <sub>2</sub>                      | 1.2        |
| 2459.2430                          | (Hex) <sub>1</sub> (HexNAc) <sub>3</sub> (Fuc) <sub>2</sub> + (Man) <sub>3</sub> (GlcNAc) <sub>2</sub>                      | 6.8        |
| 2489.2510                          | (Hex) <sub>2</sub> (HexNAc) <sub>3</sub> (Fuc) <sub>1</sub> + (Man) <sub>3</sub> (GlcNAc) <sub>2</sub>                      | 0.6        |
| 2530.2780                          | (Hex) <sub>1</sub> (HexNAc) <sub>4</sub> (Fuc) <sub>1</sub> + (Man) <sub>3</sub> (GlcNAc) <sub>2</sub>                      | 0.2        |
| 2564.2746                          | (Hex) <sub>3</sub> (HexNAc) <sub>1</sub> (Fuc) <sub>1</sub> (NeuAc) <sub>1</sub> + (Man) <sub>3</sub> (GlcNAc) <sub>2</sub> | 2.4        |
| 2600.2838                          | (Hex) <sub>7</sub> + (Man) <sub>3</sub> (GlcNAc) <sub>2</sub>                                                               | 0.2        |
| 2605.3014                          | (Hex) <sub>2</sub> (HexNAc) <sub>2</sub> (Fuc) <sub>1</sub> (NeuAc) <sub>1</sub> + (Man) <sub>3</sub> (GlcNAc) <sub>2</sub> | 0.7        |
| 2622.3093                          | (Hex) <sub>3</sub> (HexNAc) <sub>2</sub> (Fuc) <sub>2</sub> + (Man) <sub>3</sub> (GlcNAc) <sub>2</sub>                      | 0.3        |
| 2646.3256                          | (Hex) <sub>1</sub> (HexNAc) <sub>3</sub> (Fuc) <sub>1</sub> (NeuAc) <sub>1</sub> + (Man) <sub>3</sub> (GlcNAc) <sub>2</sub> | 1.7        |
| 2704.3674                          | (Hex) <sub>1</sub> (HexNAc) <sub>4</sub> (Fuc) <sub>2</sub> + (Man) <sub>3</sub> (GlcNAc) <sub>2</sub>                      | 0.5        |
| 2751.3607                          | (Hex) <sub>3</sub> (HexNAc) <sub>1</sub> (NeuAc) <sub>2</sub> + (Man) <sub>3</sub> (GlcNAc) <sub>2</sub>                    | 0.1        |
| 2809.4016                          | (Hex) <sub>3</sub> (HexNAc) <sub>2</sub> (Fuc) <sub>1</sub> (NeuAc) <sub>1</sub> + (Man) <sub>3</sub> (GlcNAc) <sub>2</sub> | 1.0        |
| 2837.4297                          | (Hex) <sub>2</sub> (HexNAc) <sub>3</sub> (Fuc) <sub>3</sub> + (Man) <sub>3</sub> (GlcNAc) <sub>2</sub>                      | 1.4        |
| 2850.4258                          | (Hex) <sub>2</sub> (HexNAc) <sub>3</sub> (Fuc) <sub>1</sub> (NeuAc) <sub>1</sub> + (Man) <sub>3</sub> (GlcNAc) <sub>2</sub> | 0.6        |
| 2966.4758                          | (Hex) <sub>2</sub> (HexNAc) <sub>2</sub> (Fuc) <sub>1</sub> (NeuAc) <sub>2</sub> + (Man) <sub>3</sub> (GlcNAc) <sub>2</sub> | 5.3        |
| 2983.4875                          | (Hex) <sub>3</sub> (HexNAc) <sub>2</sub> (Fuc) <sub>2</sub> (NeuAc) <sub>1</sub> + (Man) <sub>3</sub> (GlcNAc) <sub>2</sub> | 0.4        |
| 2996.4874                          | (Hex) <sub>3</sub> (HexNAc) <sub>2</sub> (NeuAc) <sub>2</sub> + (Man) <sub>3</sub> (GlcNAc) <sub>2</sub>                    | 0.6        |
| 3024.5083                          | (Hex) <sub>2</sub> (HexNAc) <sub>3</sub> (Fuc) <sub>2</sub> (NeuAc) <sub>1</sub> + (Man) <sub>3</sub> (GlcNAc) <sub>2</sub> | 0.9        |
| 3054.5327                          | (Hex) <sub>3</sub> (HexNAc) <sub>3</sub> (Fuc) <sub>1</sub> (NeuAc) <sub>1</sub> + (Man) <sub>3</sub> (GlcNAc) <sub>2</sub> | 0.4        |
| 3082.5575                          | (Hex) <sub>2</sub> (HexNAc) <sub>4</sub> (Fuc) <sub>3</sub> + (Man) <sub>3</sub> (GlcNAc) <sub>2</sub>                      | 1.2        |
| 3095.5615                          | (Hex) <sub>2</sub> (HexNAc) <sub>4</sub> (Fuc) <sub>1</sub> (NeuAc) <sub>1</sub> + (Man) <sub>3</sub> (GlcNAc) <sub>2</sub> | 0.1        |
| 3170.5761                          | (Hex) <sub>3</sub> (HexNAc) <sub>2</sub> (Fuc) <sub>1</sub> (NeuAc) <sub>2</sub> + (Man) <sub>3</sub> (GlcNAc) <sub>2</sub> | 8.1        |
| 3183.5907                          | (Hex) <sub>3</sub> (HexNAc) <sub>5</sub> (Fuc) <sub>1</sub> + (Man) <sub>3</sub> (GlcNAc) <sub>2</sub>                      | 0.2        |
| 3200.5907                          | (Hex) <sub>4</sub> (HexNAc) <sub>2</sub> (NeuAc) <sub>2</sub> + (Man) <sub>3</sub> (GlcNAc) <sub>2</sub>                    | 0.8        |
| 3269.6416                          | (Hex) <sub>2</sub> (HexNAc) <sub>4</sub> (Fuc) <sub>2</sub> (NeuAc) <sub>1</sub> + (Man) <sub>3</sub> (GlcNAc) <sub>2</sub> | 0.4        |
| 3344.6614                          | (Hex) <sub>3</sub> (HexNAc) <sub>2</sub> (Fuc) <sub>2</sub> (NeuAc) <sub>2</sub> + (Man) <sub>3</sub> (GlcNAc) <sub>2</sub> | 0.8        |
| 3374.6762                          | (Hex) <sub>4</sub> (HexNAc) <sub>2</sub> (Fuc) <sub>1</sub> (NeuAc) <sub>2</sub> + (Man) <sub>3</sub> (GlcNAc) <sub>2</sub> | 3.9        |
| 3385.6846                          | (Hex) <sub>2</sub> (HexNAc) <sub>3</sub> (Fuc) <sub>2</sub> (NeuAc) <sub>2</sub> + (Man) <sub>3</sub> (GlcNAc) <sub>2</sub> | 0.1        |
| 3387.6935                          | (Hex) <sub>4</sub> (HexNAc) <sub>5</sub> (Fuc) <sub>1</sub> + (Man) <sub>3</sub> (GlcNAc) <sub>2</sub>                      | 0.5        |
| 3456.7318                          | (Hex) <sub>2</sub> (HexNAc) <sub>4</sub> (Fuc) <sub>1</sub> (NeuAc) <sub>2</sub> + (Man) <sub>3</sub> (GlcNAc) <sub>2</sub> | 0.2        |
| 3514.7686                          | (Hex) <sub>2</sub> (HexNAc) <sub>5</sub> (Fuc) <sub>2</sub> (NeuAc) <sub>1</sub> + (Man) <sub>3</sub> (GlcNAc) <sub>2</sub> | 0.1        |
| 3533.7472                          | (Hex) <sub>5</sub> (HexNAc) <sub>4</sub> (NeuAc) <sub>1</sub> + (Man) <sub>3</sub> (GlcNAc) <sub>2</sub>                    | 1.1        |
| 3548.7659                          | (Hex) <sub>4</sub> (HexNAc) <sub>2</sub> (Fuc) <sub>2</sub> (NeuAc) <sub>2</sub> + (Man) <sub>3</sub> (GlcNAc) <sub>2</sub> | 2.0        |
| 3589.7845                          | (Hex) <sub>3</sub> (HexNAc) <sub>3</sub> (Fuc) <sub>2</sub> (NeuAc) <sub>2</sub> + (Man) <sub>3</sub> (GlcNAc) <sub>2</sub> | 0.2        |
| 3619.8082                          | (Hex) <sub>4</sub> (HexNAc) <sub>3</sub> (Fuc) <sub>1</sub> (NeuAc) <sub>2</sub> + (Man) <sub>3</sub> (GlcNAc) <sub>2</sub> | 0.2        |
| 3776.8773                          | (Hex) <sub>3</sub> (HexNAc) <sub>3</sub> (Fuc) <sub>1</sub> (NeuAc) <sub>3</sub> + (Man) <sub>3</sub> (GlcNAc) <sub>2</sub> | 0.6        |
| 4185.0789                          | (Hex) <sub>5</sub> (HexNAc) <sub>3</sub> (Fuc) <sub>1</sub> (NeuAc) <sub>3</sub> + (Man) <sub>3</sub> (GlcNAc) <sub>2</sub> | 0.5        |
| 4400.1875                          | (Hex) <sub>4</sub> (HexNAc) <sub>4</sub> (Fuc) <sub>2</sub> (NeuAc) <sub>3</sub> + (Man) <sub>3</sub> (GlcNAc) <sub>2</sub> | 0.4        |
| 4587.2797                          | (Hex) <sub>4</sub> (HexNAc) <sub>4</sub> (Fuc) <sub>1</sub> (NeuAc) <sub>4</sub> + (Man) <sub>3</sub> (GlcNAc) <sub>2</sub> | 0.5        |
| 4948.4513                          | (Hex) <sub>4</sub> (HexNAc) <sub>4</sub> (Fuc) <sub>1</sub> (NeuAc) <sub>5</sub> + (Man) <sub>3</sub> (GlcNAc) <sub>2</sub> | 0.4        |

**Table S3.** Relative abundancies of each of the N-glycans from the Mgat1b<sup>-/-</sup> strain.

| Observed m/z<br>(Na <sup>+</sup> ) | Composition                                                                                                                 | Relative % |
|------------------------------------|-----------------------------------------------------------------------------------------------------------------------------|------------|
| 1579.7839                          | (Hex) <sub>2</sub> + (Man) <sub>3</sub> (GlcNAc) <sub>2</sub>                                                               | 30.1       |
| 1783.8842                          | (Hex) <sub>3</sub> + (Man) <sub>3</sub> (GlcNAc) <sub>2</sub>                                                               | 7.3        |
| 1835.9242                          | (HexNAc) <sub>2</sub> (Fuc) <sub>1</sub> + (Man) <sub>3</sub> (GlcNAc) <sub>2</sub>                                         | 0.6        |
| 1987.9845                          | (Hex) <sub>4</sub> + (Man) <sub>3</sub> (GlcNAc) <sub>2</sub>                                                               | 3.8        |
| 2040.0259                          | (Hex) <sub>1</sub> (HexNAc) <sub>2</sub> (Fuc) <sub>1</sub> + (Man) <sub>3</sub> (GlcNAc) <sub>2</sub>                      | 1.4        |
| 2081.0530                          | (HexNAc) <sub>3</sub> (Fuc) <sub>1</sub> + (Man) <sub>3</sub> (GlcNAc) <sub>2</sub>                                         | 8.4        |
| 2186.0844                          | (Hex) <sub>2</sub> (HexNAc) <sub>1</sub> (NeuAc) <sub>1</sub> + (Man) <sub>3</sub> (GlcNAc) <sub>2</sub>                    | 0.4        |
| 2192.0840                          | (Hex) <sub>5</sub> + (Man) <sub>3</sub> (GlcNAc) <sub>2</sub>                                                               | 3.1        |
| 2244.1257                          | (Hex) <sub>2</sub> (HexNAc) <sub>2</sub> (Fuc) <sub>1</sub> + (Man) <sub>3</sub> (GlcNAc) <sub>2</sub>                      | 2.6        |
| 2285.1524                          | (Hex) <sub>1</sub> (HexNAc) <sub>3</sub> (Fuc) <sub>1</sub> + (Man) <sub>3</sub> (GlcNAc) <sub>2</sub>                      | 0.6        |
| 2360.1725                          | (Hex) <sub>2</sub> (HexNAc) <sub>1</sub> (Fuc) <sub>1</sub> (NeuAc) <sub>1</sub> + (Man) <sub>3</sub> (GlcNAc) <sub>2</sub> | 0.9        |
| 2396.1837                          | (Hex) <sub>6</sub> + (Man) <sub>3</sub> (GlcNAc) <sub>2</sub>                                                               | 3.6        |
| 2418.2080                          | (Hex) <sub>2</sub> (HexNAc) <sub>2</sub> (Fuc) <sub>2</sub> + (Man) <sub>3</sub> (GlcNAc) <sub>2</sub>                      | 0.8        |
| 2459.2427                          | (Hex) <sub>1</sub> (HexNAc) <sub>3</sub> (Fuc) <sub>2</sub> + (Man) <sub>3</sub> (GlcNAc) <sub>2</sub>                      | 5.3        |
| 2489.2513                          | (Hex) <sub>2</sub> (HexNAc) <sub>3</sub> (Fuc) <sub>1</sub> + (Man) <sub>3</sub> (GlcNAc) <sub>2</sub>                      | 0.4        |
| 2564.2743                          | (Hex) <sub>3</sub> (HexNAc) <sub>1</sub> (Fuc) <sub>1</sub> (NeuAc) <sub>1</sub> + (Man) <sub>3</sub> (GlcNAc) <sub>2</sub> | 1.8        |
| 2605.2994                          | (Hex) <sub>2</sub> (HexNAc) <sub>2</sub> (Fuc) <sub>1</sub> (NeuAc) <sub>1</sub> + (Man) <sub>3</sub> (GlcNAc) <sub>2</sub> | 1.1        |
| 2646.3221                          | (Hex) <sub>1</sub> (HexNAc) <sub>3</sub> (Fuc) <sub>1</sub> (NeuAc) <sub>1</sub> + (Man) <sub>3</sub> (GlcNAc) <sub>2</sub> | 1.0        |
| 2809.3995                          | (Hex) <sub>3</sub> (HexNAc) <sub>2</sub> (Fuc) <sub>1</sub> (NeuAc) <sub>1</sub> + (Man) <sub>3</sub> (GlcNAc) <sub>2</sub> | 1.0        |
| 2837.4269                          | (Hex) <sub>2</sub> (HexNAc) <sub>3</sub> (Fuc) <sub>3</sub> + (Man) <sub>3</sub> (GlcNAc) <sub>2</sub>                      | 0.9        |
| 2850.4221                          | (Hex) <sub>2</sub> (HexNAc) <sub>3</sub> (Fuc) <sub>1</sub> (NeuAc) <sub>1</sub> + (Man) <sub>3</sub> (GlcNAc) <sub>2</sub> | 0.4        |
| 2966.4748                          | (Hex) <sub>2</sub> (HexNAc) <sub>2</sub> (Fuc) <sub>1</sub> (NeuAc) <sub>2</sub> + (Man) <sub>3</sub> (GlcNAc) <sub>2</sub> | 4.2        |
| 2996.4853                          | (Hex) <sub>3</sub> (HexNAc) <sub>2</sub> (NeuAc) <sub>2</sub> + (Man) <sub>3</sub> (GlcNAc) <sub>2</sub>                    | 0.8        |
| 3024.5031                          | (Hex) <sub>2</sub> (HexNAc) <sub>3</sub> (Fuc) <sub>2</sub> (NeuAc) <sub>1</sub> + (Man) <sub>3</sub> (GlcNAc) <sub>2</sub> | 0.6        |
| 3054.5302                          | (Hex) <sub>3</sub> (HexNAc) <sub>3</sub> (Fuc) <sub>1</sub> (NeuAc) <sub>1</sub> + (Man) <sub>3</sub> (GlcNAc) <sub>2</sub> | 0.4        |
| 3082.5574                          | (Hex) <sub>2</sub> (HexNAc) <sub>4</sub> (Fuc) <sub>3</sub> + (Man) <sub>3</sub> (GlcNAc) <sub>2</sub>                      | 0.4        |
| 3095.5583                          | (Hex) <sub>2</sub> (HexNAc) <sub>4</sub> (Fuc) <sub>1</sub> (NeuAc) <sub>1</sub> + (Man) <sub>3</sub> (GlcNAc) <sub>2</sub> | 0.1        |
| 3140.5490                          | (Hex) <sub>2</sub> (HexNAc) <sub>2</sub> (Fuc) <sub>2</sub> (NeuAc) <sub>2</sub> + (Man) <sub>3</sub> (GlcNAc) <sub>2</sub> | 0.6        |
| 3170.5752                          | (Hex) <sub>3</sub> (HexNAc) <sub>2</sub> (Fuc) <sub>1</sub> (NeuAc) <sub>2</sub> + (Man) <sub>3</sub> (GlcNAc) <sub>2</sub> | 6.9        |
| 3200.5856                          | (Hex) <sub>4</sub> (HexNAc) <sub>2</sub> (NeuAc) <sub>2</sub> + (Man) <sub>3</sub> (GlcNAc) <sub>2</sub>                    | 1.1        |
| 3211.5953                          | (Hex) <sub>2</sub> (HexNAc) <sub>3</sub> (Fuc) <sub>1</sub> (NeuAc) <sub>2</sub> + (Man) <sub>3</sub> (GlcNAc) <sub>2</sub> | 0.6        |
| 3344.6561                          | (Hex) <sub>3</sub> (HexNAc) <sub>2</sub> (Fuc) <sub>2</sub> (NeuAc) <sub>2</sub> + (Man) <sub>3</sub> (GlcNAc) <sub>2</sub> | 0.8        |
| 3374.6761                          | (Hex) <sub>4</sub> (HexNAc) <sub>2</sub> (Fuc) <sub>1</sub> (NeuAc) <sub>2</sub> + (Man) <sub>3</sub> (GlcNAc) <sub>2</sub> | 2.8        |
| 3387.6880                          | (Hex) <sub>4</sub> (HexNAc) <sub>5</sub> (Fuc) <sub>1</sub> + (Man) <sub>3</sub> (GlcNAc) <sub>2</sub>                      | 0.2        |
| 3415.6970                          | (Hex) <sub>3</sub> (HexNAc) <sub>3</sub> (Fuc) <sub>1</sub> (NeuAc) <sub>2</sub> + (Man) <sub>3</sub> (GlcNAc) <sub>2</sub> | 0.6        |
| 3533.7391                          | (Hex) <sub>5</sub> (HexNAc) <sub>4</sub> (NeuAc) <sub>1</sub> + (Man) <sub>3</sub> (GlcNAc) <sub>2</sub>                    | 1.7        |
| 3548.7633                          | (Hex) <sub>4</sub> (HexNAc) <sub>2</sub> (Fuc) <sub>2</sub> (NeuAc) <sub>2</sub> + (Man) <sub>3</sub> (GlcNAc) <sub>2</sub> | 2.4        |
| 3776.8770                          | (Hex) <sub>3</sub> (HexNAc) <sub>3</sub> (Fuc) <sub>1</sub> (NeuAc) <sub>3</sub> + (Man) <sub>3</sub> (GlcNAc) <sub>2</sub> | 0.4        |
| 4587.2754                          | (Hex) <sub>4</sub> (HexNAc) <sub>4</sub> (Fuc) <sub>1</sub> (NeuAc) <sub>4</sub> + (Man) <sub>3</sub> (GlcNAc) <sub>2</sub> | 0.2        |
| 4948.4490                          | (Hex) <sub>4</sub> (HexNAc) <sub>4</sub> (Fuc) <sub>1</sub> (NeuAc) <sub>5</sub> + (Man) <sub>3</sub> (GlcNAc) <sub>2</sub> | 0.2        |

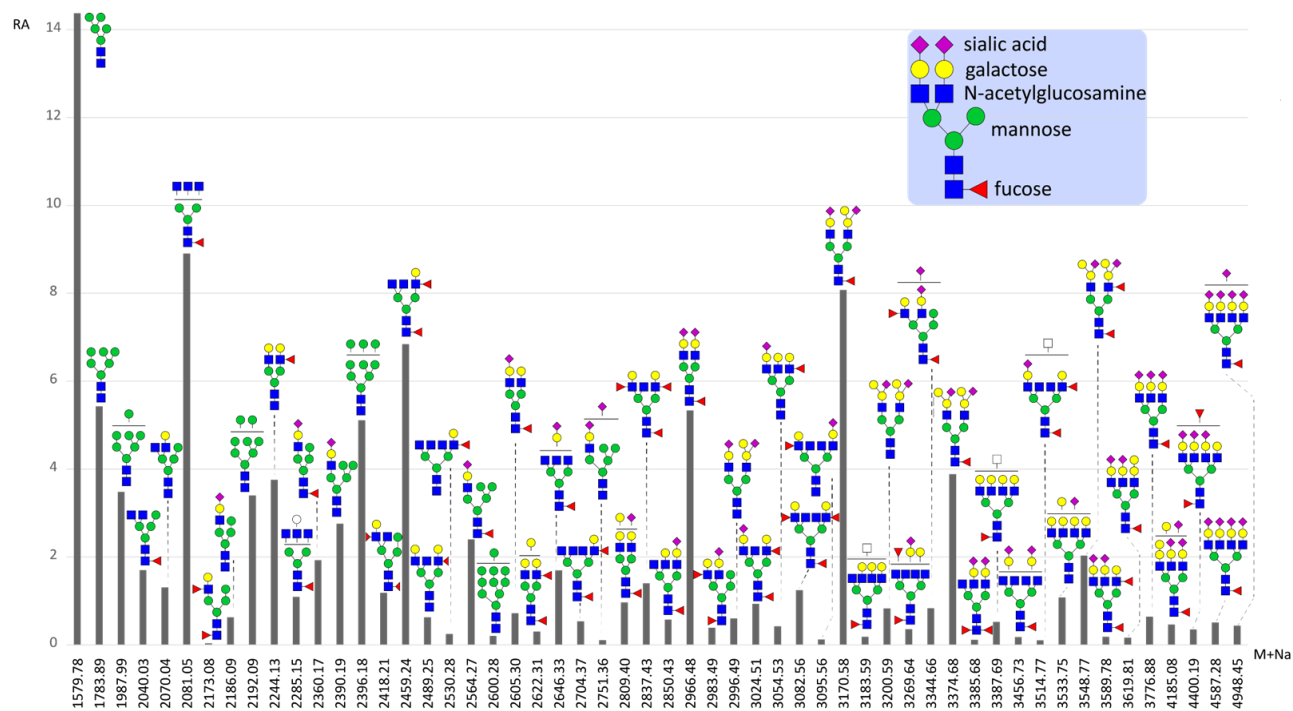

**Figure S1.** LC-ESI-MS intensities of the permethylated N-glycans derived from the Wt AB zebrafish strain.

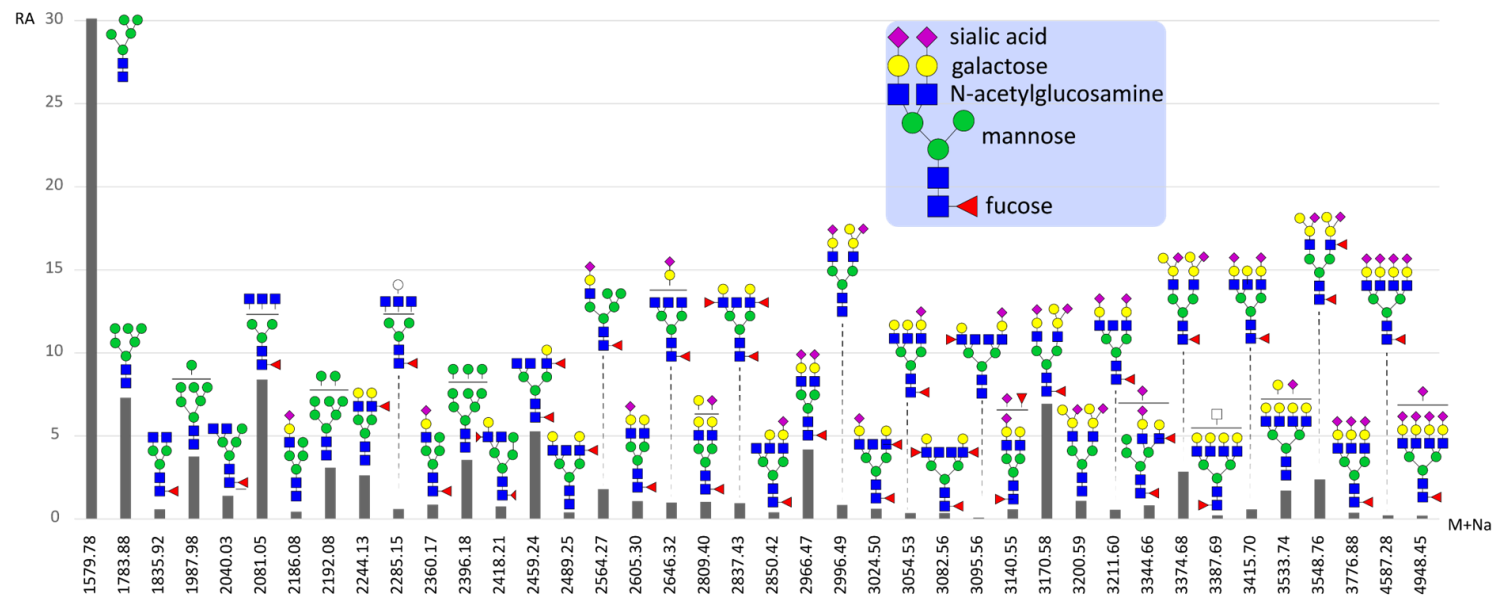

**Figure S2.** LC-ESI-MS intensities of the permethylated N-glycans derived from the *Mgat1b*<sup>-/-</sup> zebrafish strain.

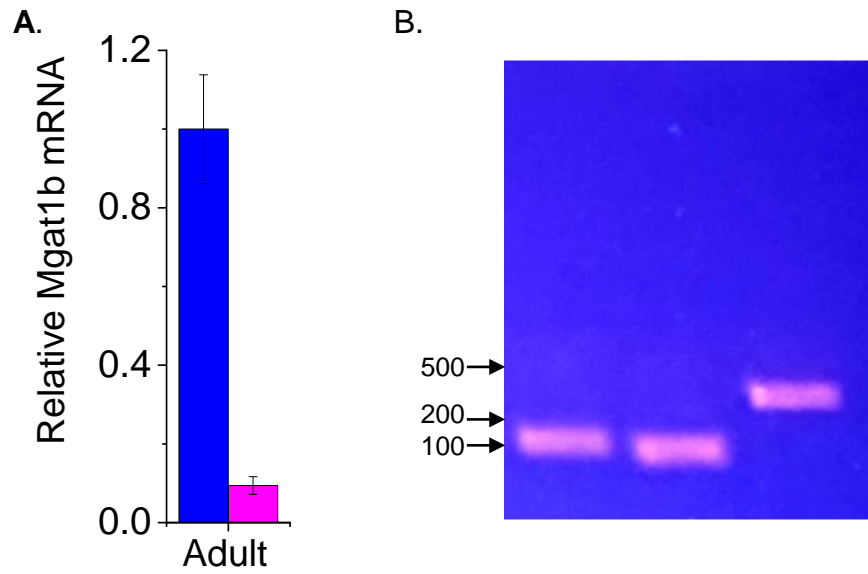

**Figure S3.** Comparing relative levels of Mgat1b transcripts from adult Wt AB and Mgat1b<sup>-/-</sup>zebrafish strains. Transcript levels were normalized to elfa (A). RT-PCR products run on agarose gel (B). The sizes of the fragments were as follows: Mgat1b, 129 bp;  $\beta$ -actin, 95 bp; elfa, 358 bp.

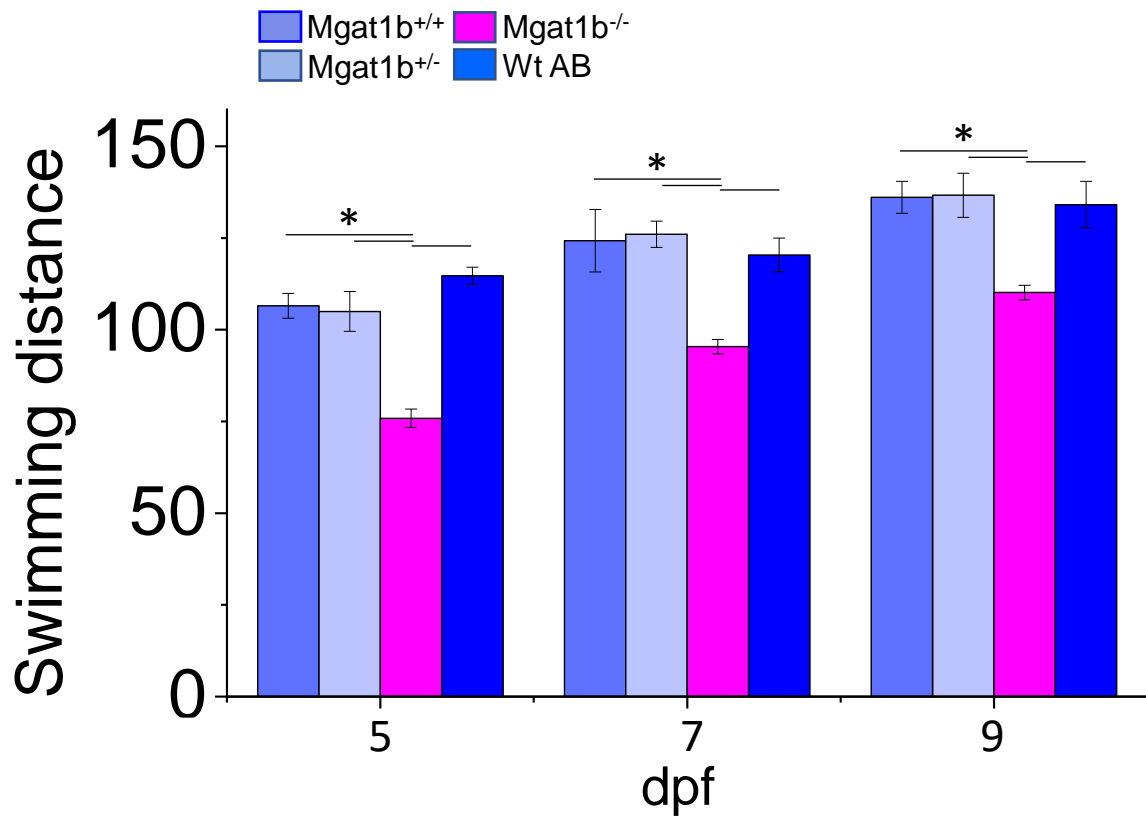

**Figure S4.** Swimming locomotor activity of Wt AB and the various Mgat1b zebrafish strains. Data are presented as mean  $\pm$  SEM,  $n \geq 21$  and were compared by one-way ANOVA with Holmes-Bonferroni adjustments,  $*p < 0.05$ ).
